# Supplementary material
Source: HighWire-hosted journal article supplement (http://cmaj.ca/highwire/filestream/150175/field_highwire_adjunct_files/0/230378-review-1-at.pdf)
Supplement: 230378-review-1-at.pdf [file 230378-review-1-at.pdf]

## SUPPLEMENTAL FIGURE 1: EOE RESOURCES

### **Recommended physician resources**

1. Katza DA. EOE review. In the Clinic-American College of Physicians, 2020
2. Arnold, Michael. EoE: Management Guidelines from AGA and JTF. Am Fam Phys 2021; 103 (9): 573-4

### **Recommended patient resources**

1. APFED (American Partnership for Eosinophilic Disorders) handout on EOE: <https://apfed.org/resources/for-healthcare-providers-and-researchers/patient-handouts/>
2. American GI Association (AGA) patient center handouts on elimination diets: <https://patient.gastro.org/six-food-elimination-diet-sfed/>
3. Alberta Health Services Patient Education on 2 food elimination diet. [www.albertahealthservices.ca/assets/info/nutrition/if-nfs-2-fed-oe-diet.pdf](http://www.albertahealthservices.ca/assets/info/nutrition/if-nfs-2-fed-oe-diet.pdf)
